# Supplementary material for: Identification and Quantification of the Main Active Anticancer Alkaloids from the Root of Glaucium flavum
Source: PubMed Central journal article supplement (PMC3876061; doi:10.3390/ijms141223533), 2013-12-02
Supplement: ijms-14-23533-s001.pdf [file ijms-14-23533-s001.pdf]

**Figure S3.**  $^1\text{H}$ - $^1\text{H}$  COSY-NMR Spectroscopic data of compound **6** (500 MHz,  $\text{CDCl}_3$ ).

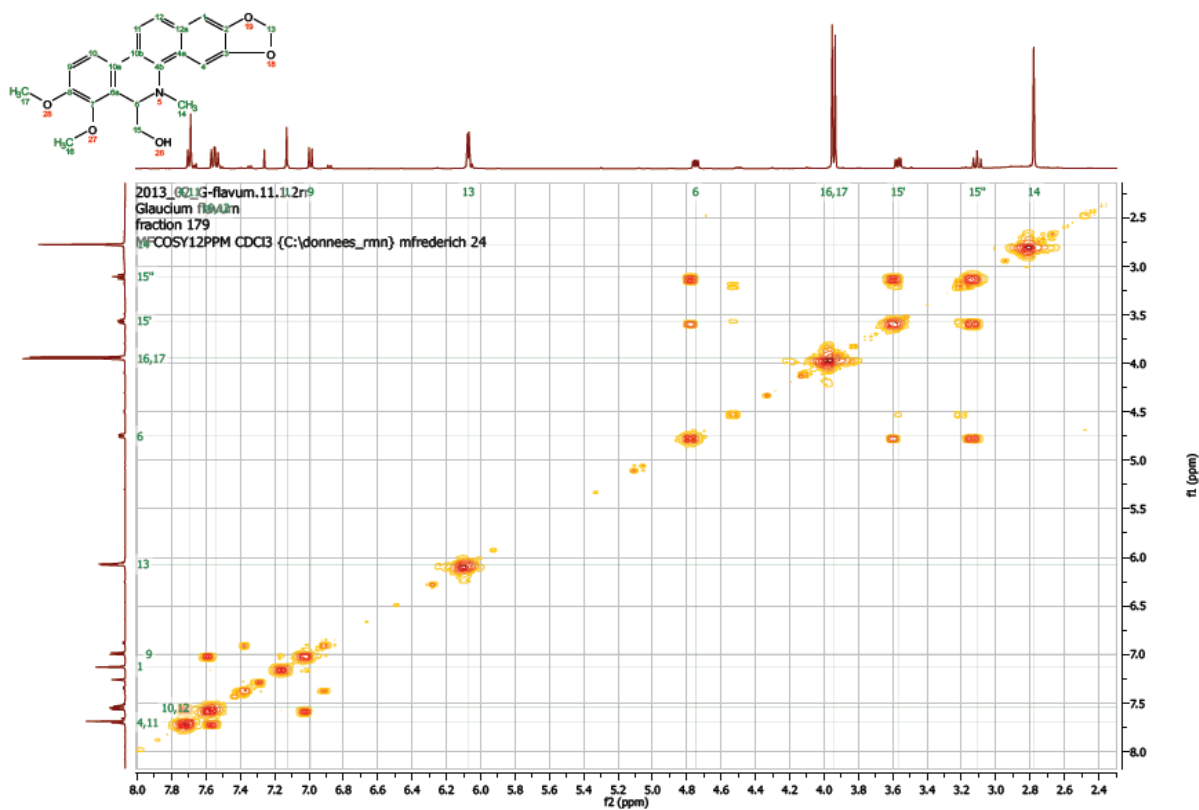

**Figure S4.** HMBC-NMR Spectroscopic data of compound **6** (500 MHz,  $\text{CDCl}_3$ ).

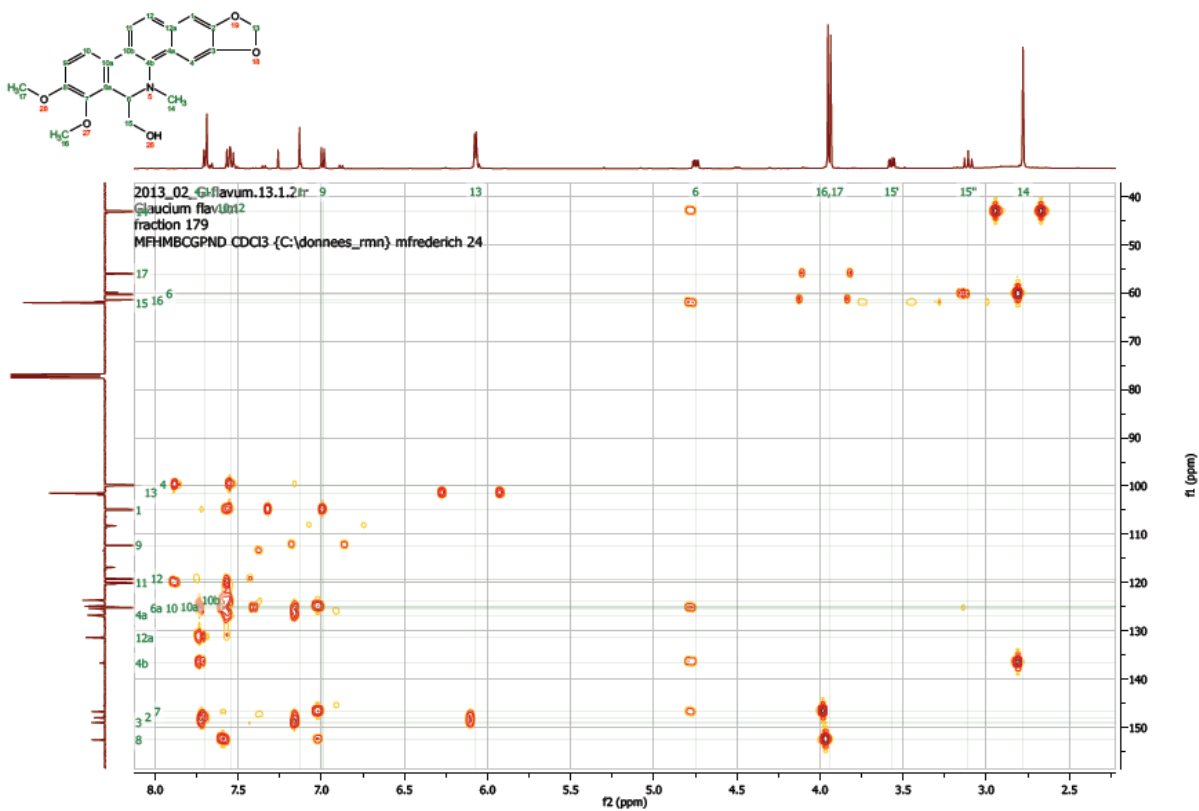

Figure S5. HSQC-NMR Spectroscopic data of compound 6 (500 MHz, CDCl<sub>3</sub>).

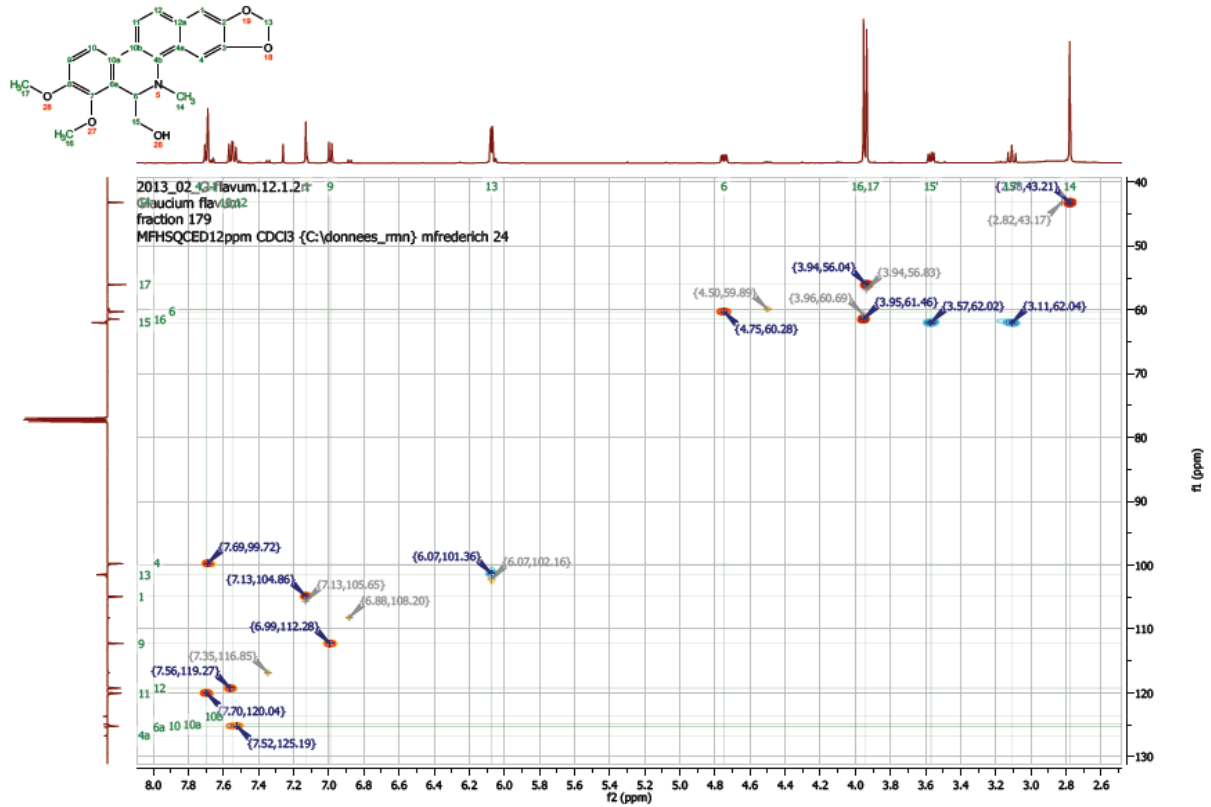

© 2013 by the authors; licensee MDPI, Basel, Switzerland. This article is an open access article distributed under the terms and conditions of the Creative Commons Attribution license (<http://creativecommons.org/licenses/by/3.0/>).
